# Supplementary material
Source: publisher figshare collection journal article supplement (https://acs.figshare.com/ndownloader/files/18673520)

# checkCIF/PLATON report

You have not supplied any structure factors. As a result the full set of tests cannot be run.

THIS REPORT IS FOR GUIDANCE ONLY. IF USED AS PART OF A REVIEW PROCEDURE FOR PUBLICATION, IT SHOULD NOT REPLACE THE EXPERTISE OF AN EXPERIENCED CRYSTALLOGRAPHIC REFEREE.

No syntax errors found.      CIF dictionary      Interpreting this report

## Datablock: 4

---

|                 |                             |                                |
|-----------------|-----------------------------|--------------------------------|
| Bond precision: | C-C = 0.0038 A              | Wavelength=0.71073             |
| Cell:           | a=7.1661(3)                 | b=15.0840(6)      c=19.1836(9) |
|                 | alpha=90                    | beta=103.732(4)      gamma=90  |
| Temperature:    | 103 K                       |                                |
|                 | Calculated                  | Reported                       |
| Volume          | 2014.35(15)                 | 2014.35(15)                    |
| Space group     | P 2/c                       | P2/c                           |
| Hall group      | -P 2yc                      | ?                              |
|                 | 4(C7 H7 N2 O), 4(C7 H9 N2   |                                |
| Moiety formula  | O), 4(Cl4 Zn), H4 O, 6(H2 ? |                                |
|                 | O), O                       |                                |
| Sum formula     | C56 H80 Cl16 N16 O16 Zn4    | C56 H80 Cl16 N16 O16 Zn4       |
| Mr              | 2062.12                     | 2062.04                        |
| Dx, g cm-3      | 1.700                       | 1.700                          |
| Z               | 1                           | 1                              |
| Mu (mm-1)       | 1.778                       | 1.778                          |
| F000            | 1048.0                      | 1048.0                         |
| F000'           | 1051.80                     |                                |
| h,k,lmax        | 10,21,27                    | 8,18,27                        |
| Nref            | 6419                        | 6299                           |
| Tmin,Tmax       |                             | 0.751,1.000                    |
| Tmin'           |                             |                                |

Correction method= # Reported T Limits: Tmin=0.751 Tmax=1.000  
AbsCorr = MULTI-SCAN

Data completeness= 0.981      Theta(max)= 30.980

R(reflections)= 0.1021( 4184)      wR2(reflections)= 0.2102( 5027)

S = 1.052      Npar= 220

---

The following ALERTS were generated. Each ALERT has the format

**test-name\_ALERT\_alert-type\_alert-level.**

Click on the hyperlinks for more details of the test.

### Alert level A

|                   |                      |                  |       |   |             |
|-------------------|----------------------|------------------|-------|---|-------------|
| PLAT417_ALERT_2_A | Short Inter D-H..H-D | H4A              | ..H5D | . | 1.68 Ang.   |
|                   |                      | -1+x,-1-y,-1/2+z | =     |   | 4_465 Check |

### Alert level B

|                   |                      |              |        |   |              |
|-------------------|----------------------|--------------|--------|---|--------------|
| PLAT417_ALERT_2_B | Short Inter D-H..H-D | H6WA         | ..H1B  | . | 1.85 Ang.    |
|                   |                      | -1-x,-y,-1-z | =      |   | 3_454 Check  |
| PLAT417_ALERT_2_B | Short Inter D-H..H-D | H6WA         | ..H1B  | . | 2.06 Ang.    |
|                   |                      | 1+x,-y,1/2+z | =      |   | 4_656 Check  |
| PLAT420_ALERT_2_B | D-H Without Acceptor | O6'          | --H6WA | . | Please Check |
| PLAT420_ALERT_2_B | D-H Without Acceptor | O7           | --H7B  | . | Please Check |

### Alert level C

ABSTY02\_ALERT\_1\_C An \_exptl\_absorpt\_correction\_type has been given without  
a literature citation. This should be contained in the  
\_exptl\_absorpt\_process\_details field.

Absorption correction given as multi-scan

DIFMX02\_ALERT\_1\_C The maximum difference density is > 0.1\*ZMAX\*0.75

The relevant atom site should be identified.

|                   |                                                  |      |   |  |              |
|-------------------|--------------------------------------------------|------|---|--|--------------|
| PLAT053_ALERT_1_C | Minimum Crystal Dimension Missing (or Error) ... |      |   |  | Please Check |
| PLAT054_ALERT_1_C | Medium Crystal Dimension Missing (or Error) ...  |      |   |  | Please Check |
| PLAT055_ALERT_1_C | Maximum Crystal Dimension Missing (or Error) ... |      |   |  | Please Check |
| PLAT097_ALERT_2_C | Large Reported Max. (Positive) Residual Density  |      |   |  | 2.45 eA-3    |
| PLAT112_ALERT_2_C | ADDSYM Detects New (Pseudo) Symm. Elem           | I    |   |  | 83 %Fit      |
| PLAT218_ALERT_3_C | Constrained U(ij) Components(s) for O7'          | .    |   |  | 2 Check      |
| PLAT218_ALERT_3_C | Constrained U(ij) Components(s) for O7           | .    |   |  | 2 Check      |
| PLAT230_ALERT_2_C | Hirshfeld Test Diff for N1                       | --C1 | . |  | 5.3 s.u.     |
| PLAT260_ALERT_2_C | Large Average Ueq of Residue Including           | O6'  |   |  | 0.107 Check  |
| PLAT260_ALERT_2_C | Large Average Ueq of Residue Including           | O7   |   |  | 0.107 Check  |
| PLAT260_ALERT_2_C | Large Average Ueq of Residue Including           | O5   |   |  | 0.107 Check  |
| PLAT260_ALERT_2_C | Large Average Ueq of Residue Including           | O6   |   |  | 0.107 Check  |
| PLAT790_ALERT_4_C | Centre of Gravity not Within Unit Cell: Resd. #  |      |   |  | 1 Note       |

C7 H7 N2 O

### Alert level G

|                   |                                                  |                |  |  |             |
|-------------------|--------------------------------------------------|----------------|--|--|-------------|
| PLAT002_ALERT_2_G | Number of Distance or Angle Restraints on AtSite |                |  |  | 14 Note     |
| PLAT005_ALERT_5_G | No Embedded Refinement Details Found in the CIF  |                |  |  | Please Do ! |
| PLAT007_ALERT_5_G | Number of Unrefined Donor-H Atoms .....          |                |  |  | 12 Report   |
| PLAT093_ALERT_1_G | No s.u.'s on H-positions, Refinement Reported as |                |  |  | mixed Check |
| PLAT128_ALERT_4_G | Alternate Setting for Input Space Group P2/c     |                |  |  | P2/n Note   |
| PLAT300_ALERT_4_G | Atom Site Occupancy of O1                        | Constrained at |  |  | 0.5 Check   |
| PLAT300_ALERT_4_G | Atom Site Occupancy of O1'                       | Constrained at |  |  | 0.5 Check   |
| PLAT300_ALERT_4_G | Atom Site Occupancy of N2                        | Constrained at |  |  | 0.5 Check   |
| PLAT300_ALERT_4_G | Atom Site Occupancy of N2'                       | Constrained at |  |  | 0.5 Check   |
| PLAT300_ALERT_4_G | Atom Site Occupancy of C7                        | Constrained at |  |  | 0.5 Check   |
| PLAT300_ALERT_4_G | Atom Site Occupancy of C7'                       | Constrained at |  |  | 0.5 Check   |
| PLAT300_ALERT_4_G | Atom Site Occupancy of O6'                       | Constrained at |  |  | 0.5 Check   |
| PLAT300_ALERT_4_G | Atom Site Occupancy of O7                        | Constrained at |  |  | 0.5 Check   |
| PLAT300_ALERT_4_G | Atom Site Occupancy of O7'                       | Constrained at |  |  | 0.5 Check   |
| PLAT300_ALERT_4_G | Atom Site Occupancy of O6                        | Constrained at |  |  | 0.5 Check   |
| PLAT301_ALERT_3_G | Main Residue Disorder .....(Resd 1 )             |                |  |  | 30% Note    |
| PLAT302_ALERT_4_G | Anion/Solvent/Minor-Residue Disorder (Resd 5 )   |                |  |  | 100% Note   |
| PLAT302_ALERT_4_G | Anion/Solvent/Minor-Residue Disorder (Resd 6 )   |                |  |  | 100% Note   |

|                   |                                                  |      |       |
|-------------------|--------------------------------------------------|------|-------|
| PLAT302_ALERT_4_G | Anion/Solvent/Minor-Residue Disorder (Resd 8 )   | 100% | Note  |
| PLAT304_ALERT_4_G | Non-Integer Number of Atoms in ..... Resd 5      | 2.50 | Check |
| PLAT304_ALERT_4_G | Non-Integer Number of Atoms in ..... Resd 8      | 0.25 | Check |
| PLAT311_ALERT_2_G | Isolated Disordered Oxygen Atom (No H's ?) ..... | 07'  | Check |
| PLAT311_ALERT_2_G | Isolated Disordered Oxygen Atom (No H's ?) ..... | 06   | Check |
| PLAT720_ALERT_4_G | Number of Unusual/Non-Standard Labels .....      | 1    | Note  |
| PLAT779_ALERT_4_G | Suspect or Irrelevant (Bond) Angle in CIF .... # | 27   | Check |
|                   | C7 -C4 -C7' 1.555 1.555 1.555                    | 0.00 | Deg.  |
| PLAT790_ALERT_4_G | Centre of Gravity not Within Unit Cell: Resd. #  | 2    | Note  |
|                   | C7 H9 N2 O                                       |      |       |
| PLAT790_ALERT_4_G | Centre of Gravity not Within Unit Cell: Resd. #  | 3    | Note  |
|                   | Cl4 Zn                                           |      |       |
| PLAT790_ALERT_4_G | Centre of Gravity not Within Unit Cell: Resd. #  | 4    | Note  |
|                   | Cl4 Zn                                           |      |       |
| PLAT790_ALERT_4_G | Centre of Gravity not Within Unit Cell: Resd. #  | 5    | Note  |
|                   | H4 O                                             |      |       |
| PLAT790_ALERT_4_G | Centre of Gravity not Within Unit Cell: Resd. #  | 6    | Note  |
|                   | H2 O                                             |      |       |
| PLAT790_ALERT_4_G | Centre of Gravity not Within Unit Cell: Resd. #  | 7    | Note  |
|                   | H2 O                                             |      |       |
| PLAT790_ALERT_4_G | Centre of Gravity not Within Unit Cell: Resd. #  | 8    | Note  |
|                   | O                                                |      |       |
| PLAT794_ALERT_5_G | Tentative Bond Valency for Zn1 (II) .            | 2.01 | Info  |
| PLAT794_ALERT_5_G | Tentative Bond Valency for Zn2 (II) .            | 2.01 | Info  |
| PLAT860_ALERT_3_G | Number of Least-Squares Restraints .....         | 9    | Note  |
| PLAT899_ALERT_4_G | SHELXL97 is Deprecated and Succeeded by SHELXL   | 2018 | Note  |
| PLAT950_ALERT_5_G | Calculated (ThMax) and CIF-Reported Hmax Differ  | 2    | Units |
| PLAT951_ALERT_5_G | Calculated (ThMax) and CIF-Reported Kmax Differ  | 3    | Units |

---

1 **ALERT level A** = Most likely a serious problem - resolve or explain  
 4 **ALERT level B** = A potentially serious problem, consider carefully  
 15 **ALERT level C** = Check. Ensure it is not caused by an omission or oversight  
 38 **ALERT level G** = General information/check it is not something unexpected

6 ALERT type 1 CIF construction/syntax error, inconsistent or missing data  
 15 ALERT type 2 Indicator that the structure model may be wrong or deficient  
 4 ALERT type 3 Indicator that the structure quality may be low  
 27 ALERT type 4 Improvement, methodology, query or suggestion  
 6 ALERT type 5 Informative message, check

---

It is advisable to attempt to resolve as many as possible of the alerts in all categories. Often the minor alerts point to easily fixed oversights, errors and omissions in your CIF or refinement strategy, so attention to these fine details can be worthwhile. In order to resolve some of the more serious problems it may be necessary to carry out additional measurements or structure refinements. However, the purpose of your study may justify the reported deviations and the more serious of these should normally be commented upon in the discussion or experimental section of a paper or in the "special\_details" fields of the CIF. checkCIF was carefully designed to identify outliers and unusual parameters, but every test has its limitations and alerts that are not important in a particular case may appear. Conversely, the absence of alerts does not guarantee there are no aspects of the results needing attention. It is up to the individual to critically assess their own results and, if necessary, seek expert advice.

### **Publication of your CIF in IUCr journals**

A basic structural check has been run on your CIF. These basic checks will be run on all CIFs submitted for publication in IUCr journals (*Acta Crystallographica*, *Journal of Applied Crystallography*, *Journal of Synchrotron Radiation*); however, if you intend to submit to *Acta Crystallographica Section C* or *E* or *IUCrData*, you should make sure that full publication checks are run on the final version of your CIF prior to submission.

### **Publication of your CIF in other journals**

Please refer to the *Notes for Authors* of the relevant journal for any special instructions relating to CIF submission.

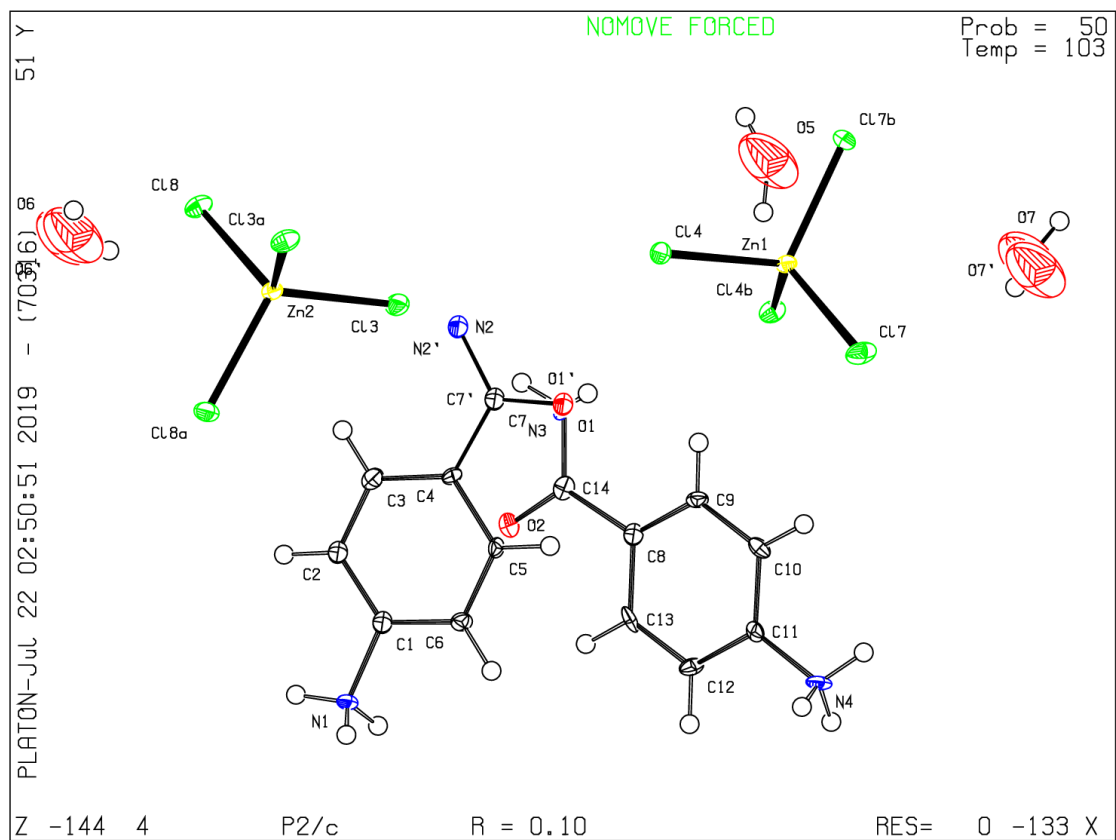

Supplement: Supplementary file 1 [file 18673520]
